# Supplementary material for: Ceftobiprole Medocaril Is an Effective Post-Exposure Treatment in the Fischer 344 Rat Model of Pneumonic Tularemia
Source: MDPI journal article supplement (doi:10.3390/antibiotics12081337), 2023-08-19
Supplement: s1 [file s1]

**Table S1.** Descriptive statistics for body weight by challenge group and day.

| <b>Phase I Group</b> | <b>Day post-challenge</b> | <b>N</b> | <b>Arithmetic Mean (95% Confidence Interval) (g)</b> |
|----------------------|---------------------------|----------|------------------------------------------------------|
| 1                    | 0                         | 10       | 167.90 (164.22, 171.58)                              |
|                      | 7                         | 7        | 139.47 (134.58, 144.36)                              |
|                      | 14                        | 1        | *135.80 (--)                                         |
| 2                    | 0                         | 10       | 167.72 (162.12, 173.32)                              |
|                      | 7                         | 4        | 134.13 (126.62, 141.63)                              |

\* N = 1; therefore, not a group mean at this time point

The actual weight range of all rats was 153.4 – 177.2 g.

**Table S2.** Descriptive statistics for body weight by treatment group and day.

| Phase II Group | Day post-challenge | N  | Arithmetic Mean (95% Confidence Interval) (g) |
|----------------|--------------------|----|-----------------------------------------------|
| 1              | 0                  | 12 | 176.18 (172.72, 179.64)                       |
|                | 1                  | 12 | 175.02 (171.11, 178.93)                       |
|                | 2                  | 12 | 176.75 (173.15, 180.35)                       |
|                | 3                  | 12 | 169.68 (165.32, 174.03)                       |
|                | 4                  | 12 | 163.57 (159.63, 167.52)                       |
|                | 5                  | 12 | 165.53 (161.77, 169.30)                       |
|                | 6                  | 12 | 165.51 (161.65, 169.37)                       |
|                | 7                  | 12 | 165.22 (161.03, 169.40)                       |
|                | 8                  | 12 | 163.65 (158.78, 168.51)                       |
|                | 9                  | 12 | 164.45 (159.29, 169.61)                       |
|                | 10                 | 12 | 163.40 (159.19, 167.61)                       |
|                | 11                 | 11 | 163.48 (159.85, 167.10)                       |
|                | 12                 | 11 | 166.35 (161.82, 170.87)                       |
|                | 13                 | 11 | 165.31 (161.38, 169.25)                       |
|                | 14                 | 11 | 168.57 (165.08, 172.07)                       |
|                | 15                 | 11 | 171.35 (167.28, 175.43)                       |
|                | 16                 | 11 | 172.62 (168.32, 176.92)                       |
|                | 17                 | 11 | 173.68 (169.35, 178.01)                       |
|                | 24                 | 11 | 179.45 (173.26, 185.65)                       |
|                | 31                 | 11 | 186.49 (181.04, 191.94)                       |
| 2              | 0                  | 12 | 175.91 (171.76, 180.06)                       |
|                | 1                  | 12 | 176.41 (171.92, 180.90)                       |
|                | 2                  | 12 | 176.89 (173.19, 180.60)                       |
|                | 3                  | 12 | 170.08 (165.53, 174.63)                       |
|                | 4                  | 12 | 167.46 (163.31, 171.62)                       |
|                | 5                  | 12 | 170.60 (166.94, 174.26)                       |
|                | 6                  | 12 | 170.27 (166.43, 174.12)                       |
|                | 7                  | 12 | 170.89 (166.98, 174.81)                       |
|                | 8                  | 12 | 170.21 (166.25, 174.17)                       |
|                | 9                  | 12 | 170.70 (167.26, 174.15)                       |
|                | 10                 | 12 | 170.95 (167.63, 174.27)                       |
|                | 11                 | 11 | 170.74 (167.29, 174.20)                       |
|                | 12                 | 11 | 174.85 (171.32, 178.37)                       |
|                | 13                 | 11 | 174.45 (170.78, 178.11)                       |
|                | 14                 | 11 | 174.79 (171.20, 178.38)                       |
|                | 15                 | 11 | 176.10 (171.74, 180.46)                       |
|                | 16                 | 11 | 175.94 (171.34, 180.53)                       |
|                | 17                 | 11 | 176.44 (172.63, 180.25)                       |
|                | 24                 | 11 | 182.88 (177.81, 187.95)                       |
|                | 31                 | 11 | 184.23 (179.86, 188.60)                       |
| 3              | 0                  | 8  | 173.20 (168.56, 177.84)                       |
|                | 1                  | 8  | 173.55 (169.48, 177.62)                       |
|                | 2                  | 8  | 173.83 (169.77, 177.88)                       |
|                | 3                  | 8  | 166.35 (161.80, 170.90)                       |
|                | 4                  | 8  | 158.10 (154.61, 161.59)                       |
|                | 5                  | 8  | 156.18 (152.12, 160.23)                       |
|                | 6                  | 8  | 148.39 (143.51, 153.28)                       |
|                | 7                  | 8  | 145.76 (140.81, 150.71)                       |
|                | 8                  | 7  | 141.19 (136.44, 145.95)                       |
|                | 9                  | 7  | 137.86 (133.61, 142.12)                       |
|                | 10                 | 4  | 131.93 (121.57, 142.28)                       |

**Table S3.** Summary of statistical test results for mean shift from baseline for daily or weekly body weights in Phase II.

| Day post-challenge | Mean Shift from Baseline (g) |         |          | Group Effect P-Value | Group Comparison Estimate (Relationship) P-Value#               |
|--------------------|------------------------------|---------|----------|----------------------|-----------------------------------------------------------------|
|                    | 1                            | 2       | 3        |                      |                                                                 |
| 1                  | -1.16                        | 0.50    | 0.35     | 0.1923               | NS                                                              |
| 2                  | 0.57                         | 0.98    | 0.63     | 0.8452               | NS                                                              |
| 3                  | -6.51 ↓                      | -5.83 ↓ | -6.85 ↓  | 0.7984               | NS                                                              |
| 4                  | -12.61 ↓                     | -8.45 ↓ | -15.10 ↓ | 0.0010*              | 4.16 (1<2) 0.0217<br>6.66 (3<2) 0.0010                          |
| 5                  | -10.65 ↓                     | -5.31 ↓ | -17.02 ↓ | <0.0001*             | 5.34 (1<2) 0.0052<br>6.38 (3<1) 0.0028<br>11.71 (3<2) <0.0001   |
| 6                  | -10.67 ↓                     | -5.64 ↓ | -24.81 ↓ | <0.0001*             | 5.04 (1<2) 0.0078<br>14.14 (3<1) <0.0001<br>19.17 (3<2) <0.0001 |
| 7                  | -10.96 ↓                     | -5.02 ↓ | -27.44 ↓ | <0.0001*             | 5.95 (1<2) 0.0139<br>16.47 (3<1) <0.0001<br>22.42 (3<2) <0.0001 |
| 8                  | -12.54 ↓                     | -5.70 ↓ | -31.29 ↓ | <0.0001*             | 6.84 (1<2) 0.0036<br>18.76 (3<1) <0.0001<br>25.59 (3<2) <0.0001 |
| 9                  | -11.73 ↓                     | -5.21 ↓ | -34.62 ↓ | <0.0001*             | 6.53 (1<2) 0.0111<br>22.89 (3<1) <0.0001<br>29.42 (3<2) <0.0001 |
| 10                 | -12.78 ↓                     | -4.96 ↓ | -39.70 ↓ | <0.0001*             | 7.82 (1<2) 0.0003<br>26.92 (3<1) <0.0001<br>34.74 (3<2) <0.0001 |
| 11                 | -12.20 ↓                     | -5.93 ↓ | -        | 0.0005*              | 6.27 (1<2) 0.0005                                               |
| 12                 | -9.33 ↓                      | -1.83   | -        | 0.0004*              | 7.51 (1<2) 0.0004                                               |
| 13                 | -10.37 ↓                     | -2.22 ↓ | -        | <0.0001*             | 8.14 (1<2) <0.0001                                              |
| 14                 | -7.11 ↓                      | -1.88   | -        | 0.0008*              | 5.22 (1<2) 0.0008                                               |
| 15                 | -4.32 ↓                      | -0.57   | -        | 0.0277*              | 3.75 (1<2) 0.0277                                               |
| 16                 | -3.06 ↓                      | -0.74   | -        | 0.1194               | NS                                                              |
| 17                 | -2.00 ↓                      | -0.24   | -        | 0.1895               | NS                                                              |
| 24                 | 3.78                         | 6.21 ↑  | -        | 0.4689               | NS                                                              |
| 31                 | 10.81 ↑                      | 7.56 ↑  | -        | 0.0449*              | 3.26 (2<1) 0.0449                                               |

↑ Indicates the mean at the day was significantly greater than that at baseline (at the 0.05 level).  
↓ Indicates the mean at the day was significantly less than at baseline (at the 0.05 level).  
\* Group effect was statistically significant at the 0.05 level.  
# Cells contain all pairwise comparisons that were significant at the 0.05 level. The format within each cell is: (1) the mean difference, (2) the relationship between the corresponding pair of group means shown in parentheses, and (3) the Tukey-adjusted p-value. Note that all animals in the placebo group died on or before 10 days post-challenge, so comparisons to the treatment groups were not possible after 10 days post-challenge.  
NS There were no significant pairwise differences at the 0.05 level.
